# Supplementary material
Source: PubMed Central journal article supplement (PMC3318711)
Supplement: supp_M111.266346_jbc.M111.266346-1.pdf [file supp_M111.266346_jbc.M111.266346-1.pdf]

**Supplemental Figure 1.**

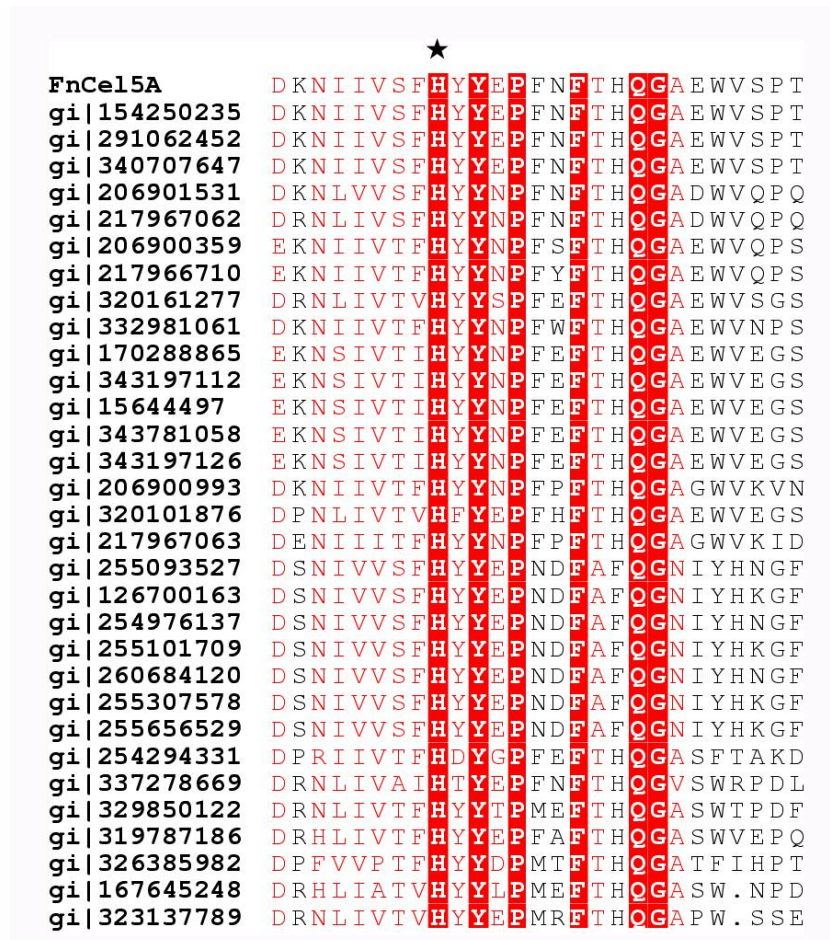

**Supplemental Figure 1. Sequence alignment of FnCel5A with homologues.** The alignment was performed using ClustalW and ESPript. The conserved histidine is marked by *black star*.
