# Supplementary material
Source: PubMed Central journal article supplement (PMC3318711)
Supplement: supp_M111.266346_jbc.M111.266346-2.pdf [file supp_M111.266346_jbc.M111.266346-2.pdf]

**Supplemental Table 1. Primers used for cloning and mutagenesis of FnCel5A.**

| <b>Constructs</b> | <b>Primers</b> | <b>Sequences</b>                     |
|-------------------|----------------|--------------------------------------|
| FnCel5A           | Forward        | CAGCGCCATATGGACCAAAGTGTGAGTAAGAC     |
|                   | Reverse        | GTCGGATCCTTATTTTCCAAGTGCAG           |
| FnCel5AND         | Forward        | CAGCGCCATATGGCTTTTGAATATAATAA        |
|                   | Reverse        | GACGTCGGATCCTTATTTTCCAAGTGCAG        |
| E167Q             | Forward        | TATTTAACCAACCAGCTCAA AATTTGACTCCGA   |
|                   | Reverse        | AATTTTGAGCTGGTTGGTTAAATATTTCAAAGA    |
| E167D             | Forward        | TATTTAACGATCCAGCTCAA AATTTGACTCCGA   |
|                   | Reverse        | AATTTTGAGCTGGATCGTTAAATATTTCAAAGA    |
| E167F             | Forward        | TATTTAACTTTCCAGCTCAA AATTTGACTCCGA   |
|                   | Reverse        | AATTTTGAGCTGGAAAGTTAAATATTTCAAAGA    |
| E167S             | Forward        | TATTTAACTCTCCAGCTCAA AATTTGACTCCGA   |
|                   | Reverse        | AATTTTGAGCTGGAGAGTTAAATATTTCAAAGA    |
| E167R             | Forward        | TATTTAACAGACCAGCTCAA AATTTGACTCCGA   |
|                   | Reverse        | AATTTTGAGCTGGTCTGTTAAATATTTCAAAGA    |
| E283Q             | Forward        | ATATTTT TAGGTCAATTTGGCGCATATTCA      |
|                   | Reverse        | CGCCAAATTGACCTAAA AATATCGGAACAT      |
| H226A             | Forward        | GTTTCATT CGCTTATTACGAACCTTTTAATTTTAC |
|                   | Reverse        | TCGTAATAAGCGAATGAAACAATTATATTTTATC   |
| H226K             | Forward        | GTTTCATTCAAATATTACGAACCTTTTAATTTTAC  |
|                   | Reverse        | TCGTAATATTTGAATGAAACAATTATATTTTATC   |
| H226S             | Forward        | GTTTCATTCTCTTATTACGAACCTTTTAATTTTAC  |
|                   | Reverse        | TCGTAATAAGAGAATGAAACAATTATATTTTATC   |
| H226F             | Forward        | GTTTCATTCTTTTATTACGAACCTTTTAATTTTAC  |
|                   | Reverse        | TCGTAATAAAAGAATGAAACAATTATATTTTATC   |
| H226Y             | Forward        | GTTTCATTCTATTATTACGAACCTTTTAATTTTAC  |
|                   | Reverse        | TCGTAATAATAGAATGAAACAATTATATTTTATC   |
| H226E             | Forward        | GTTTCATT CGAATATTACGAACCTTTTAATTTTAC |
|                   | Reverse        | TCGTAATATTCGAATGAAACAATTATATTTTATC   |
| W61A              | Forward        | GAAGGTTCTGCAGGAGTTTATATTGAGGA        |
|                   | Reverse        | ATAAACTCCTGCAGAACCTTCTACAGGGG        |
| W204A             | Forward        | CGTTCCAAATTGGTCGAACTA CAGCTACGTA AG  |
|                   | Reverse        | GTAATTATAGACGTTCCAAATTGGTCGAACTACAG  |
| W240A             | Forward        | CAAGGTGCTGAAGCTGTTAGTCCAACGCTTCCA    |
|                   | Reverse        | TTGGACTAACAGCTTCAGCACCTTGGTGAGTAA    |
